# Supplementary material for: Size Matters: Arginine-Derived Peptides Targeting the PSMA Receptor Can Efficiently Complex but Not Transfect siRNA
Source: PubMed Central journal article supplement — Mol Ther Nucleic Acids. 2019 Oct 23;18:863–70. doi: 10.1016/j.omtn.2019.10.013 (PMC6861565; doi:10.1016/j.omtn.2019.10.013), 2019-10-23

OMTN, Volume 18

## **Supplemental Information**

**Size Matters: Arginine-Derived Peptides**

**Targeting the PSMA Receptor Can Efficiently**

**Complex but Not Transfect siRNA**

**Christopher N. Cultrara, Sunil Shah, Gina Antuono, Claudia J. Heller, Jorge A. Ramos, Uri Samuni, Jenny Zilberberg, and David Sabatino**

# Size Matters: Arginine-Derived Peptides Targeting the PSMA Receptor can Efficiently Complex but not Transfect siRNA

Christopher N. Cultrara<sup>†</sup>, Sunil Shah<sup>†</sup>, Gina Antuono<sup>†</sup>, Claudia J. Heller<sup>†</sup>, Jorge A Ramos<sup>^</sup>, Uri Samuni<sup>^</sup>, Jenny Zilberberg<sup>‡\*</sup>, and David Sabatino<sup>†\*\*#</sup>

<sup>†</sup>Department of Chemistry and Biochemistry, 400 South Orange Avenue, South Orange NJ 07079;

<sup>^</sup>Department of Chemistry and Biochemistry, Queens College, City University of New York, Flushing, NY 11367, USA and the Ph.D. Programs in Biochemistry and Chemistry, The Graduate Center of the City University of New York, New York, NY 10016;

<sup>‡</sup>Center for Discovery and Innovation, Hackensack University Medical Center, 340 Kingsland Street, Building 102, Nutley, NJ 07110.

## Supplementary Information

### TABLE OF CONTENTS

|                  |                                                        |   |
|------------------|--------------------------------------------------------|---|
| <b>Scheme 1</b>  | Synthetic Scheme of the PSMA-1-R <sub>6</sub> Peptides | 3 |
| <b>Table 1</b>   | Characterization of PSMA-1 Peptides                    | 3 |
| <b>Figure S1</b> | PSMA-1 Binding by Flow Cytometry                       | 4 |
| <b>Table 2</b>   | DLS Analysis of siRNA:CTP Complexes                    | 4 |
| <b>Figure S2</b> | TEM Analysis of siRNA:CTP Complexes                    | 5 |
| <b>Figure S3</b> | RP IP HPLC Analysis of FITC-PSMA-1 (220nm)             | 6 |
| <b>Figure S4</b> | RP IP HPLC Analysis of FITC-PSMA-1 (480nm)             | 7 |
| <b>Figure S5</b> | ESI-MS Analysis of FITC-PSMA-1                         | 8 |

|                   |                                                           |    |
|-------------------|-----------------------------------------------------------|----|
| <b>Figure S6</b>  | RP IP HPLC Analysis of PSMA-1-R <sub>6</sub> (220nm)      | 9  |
| <b>Figure S7</b>  | ESI-MS Analysis of PSMA-1-R <sub>6</sub>                  | 10 |
| <b>Figure S8</b>  | RP IP HPLC Analysis of FITC-PSMA-1-R <sub>9</sub> (220nm) | 11 |
| <b>Figure S9</b>  | RP IP HPLC Analysis of FITC-PSMA-1-R <sub>9</sub> (480nm) | 12 |
| <b>Figure S10</b> | ESI-MS Analysis of FITC-PSMA-1-R <sub>9</sub>             | 13 |



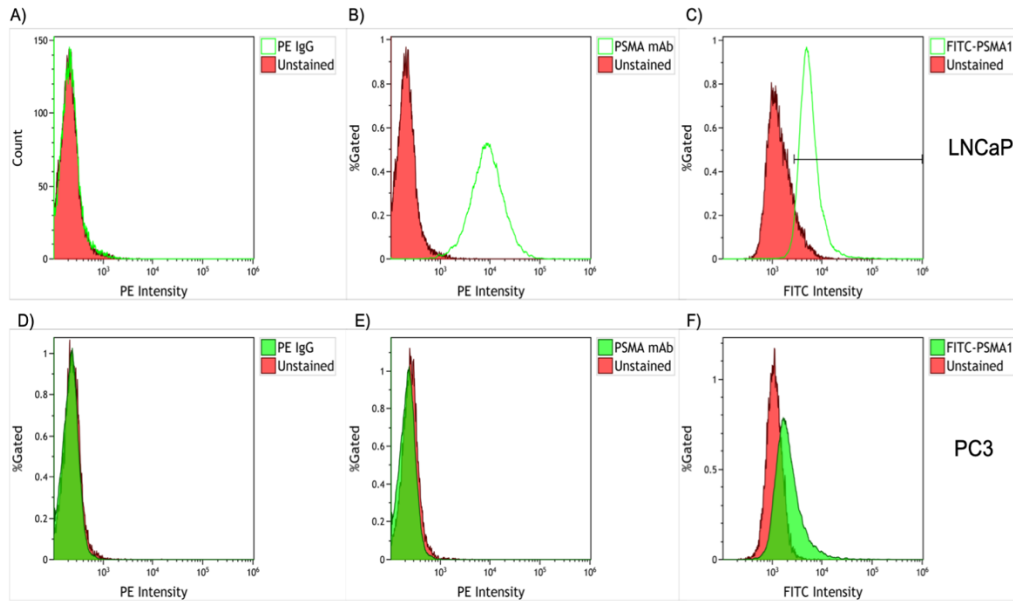

**Supplementary Figure S1.** Flow cytometric analysis of FITC-PSMA-1 binding to LNCaP and PC3 PCa cell lines. Binding was measured after 15 minutes for the PSMA mAb (B and E) or 60 minutes for the peptide (C and f).

| Sample              | Effective Diameter (nm) | Zeta Potential (mV) |
|---------------------|-------------------------|---------------------|
| siRNA : Trans-IT X2 | 411 ± 55                | 0.77 ± 1.24         |
|                     | 456 ± 60                |                     |
| siRNA: PSMA-1-R6    | 1450 ± 332              | -2.16 ± 0.39        |
|                     | 878 ± 40                |                     |
| siRNA: PSMA-1-R9    | 2135 ± 357              | -5.88 ± 0.25        |
|                     | 1041 ± 222              |                     |

**Supplementary Table 2.** Size and Zeta potential analysis by DLS of the siRNA: PSMA-1 complexes compared to that of an siRNA: Trans-IT X2 transfection reagent complex. The top

diameter represents the relative aggregate sizes while the bottom represents individual particle sizes

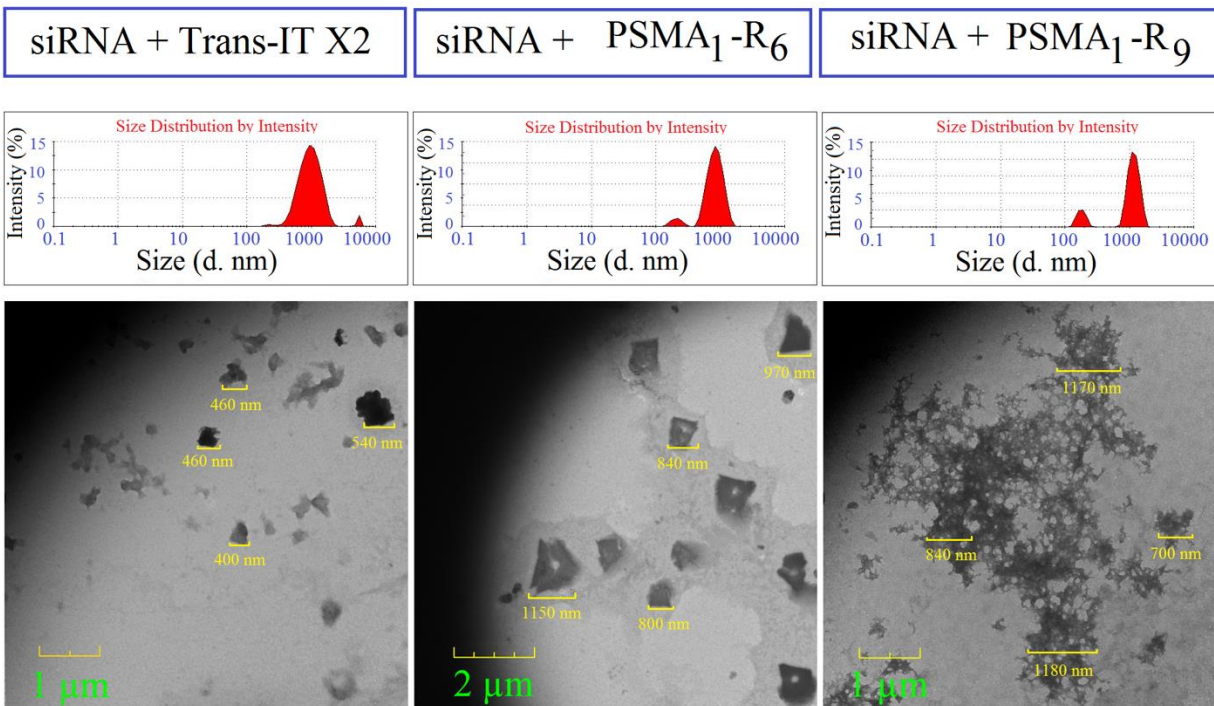

**Supplementary Figure S2.** DLS and TEM analysis of the siRNA: PSMA-1 complexes as compared to an siRNA: transfection reagent complex.

**Supplementary Figure S3** RP IP HPLC Analysis of FITC-PSMA-1 (220nm)

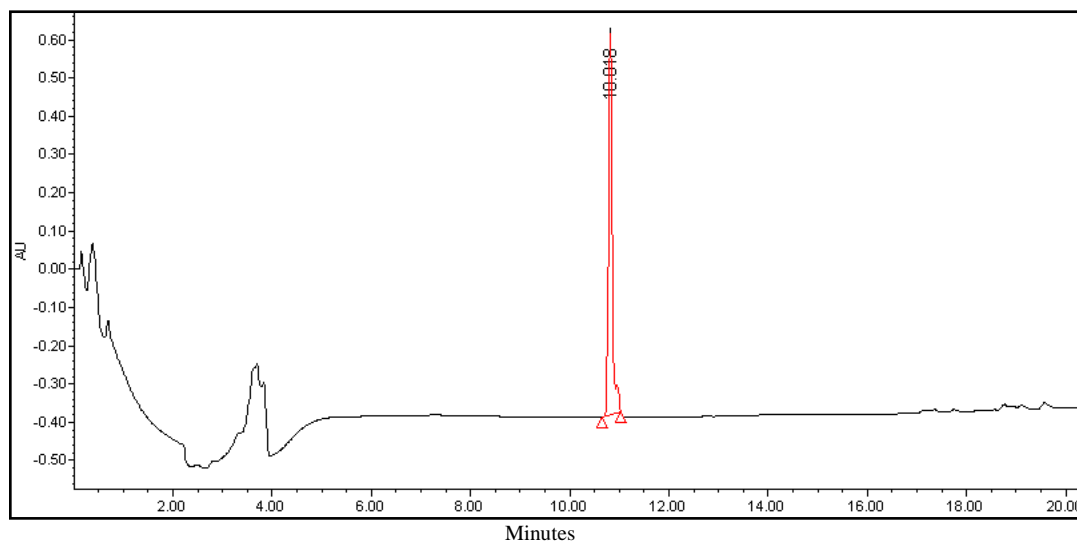

|   | RT     | % Area | Area ( $\mu\text{V}\cdot\text{sec}$ ) |
|---|--------|--------|---------------------------------------|
| 1 | 10.018 | 100    | 979467                                |

**Supplementary Figure S4** RP IP HPLC Analysis of FITC-PSMA-1 (480nm)

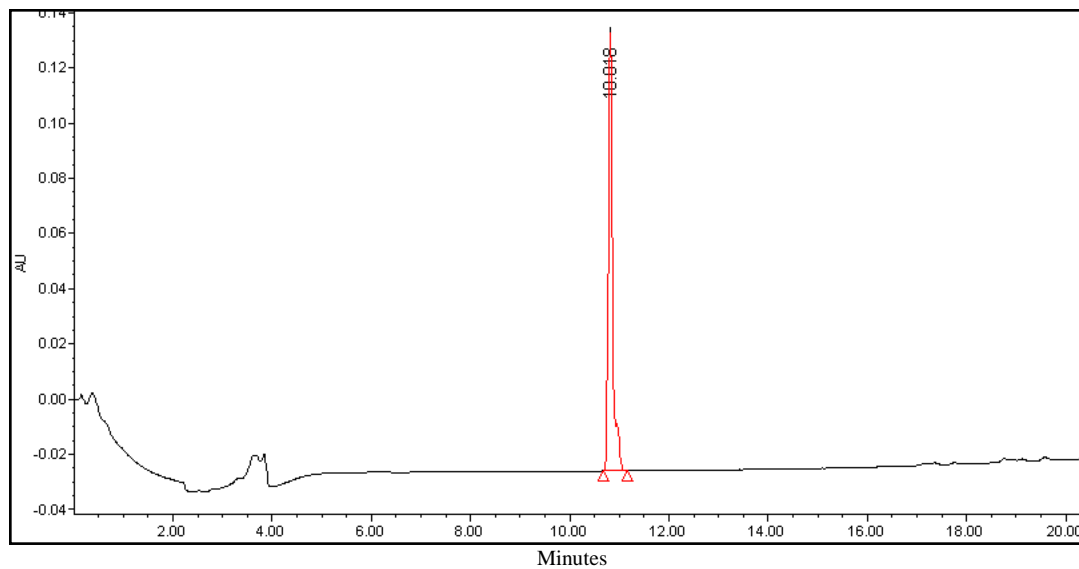

|   | RT     | % Area | Area ( $\mu\text{V}\cdot\text{sec}$ ) |
|---|--------|--------|---------------------------------------|
| 1 | 10.018 | 100    | 156568                                |



**Supplementary Figure S5** ESI-MS Analysis of FITC-PSMA-1

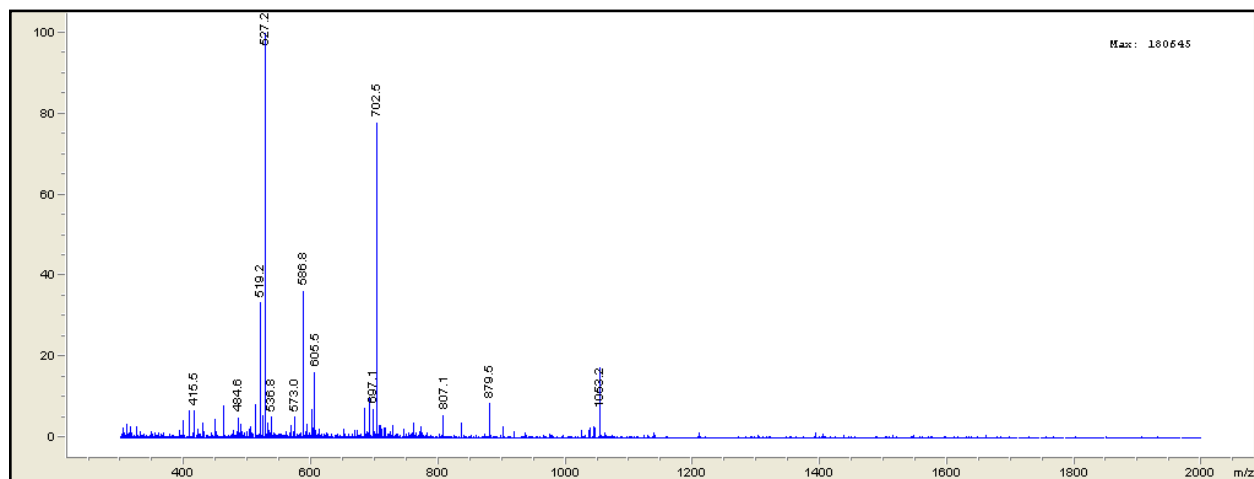

**Supplementary Figure S6** RP IP HPLC Analysis of PSMA-1-R<sub>6</sub> (220nm)

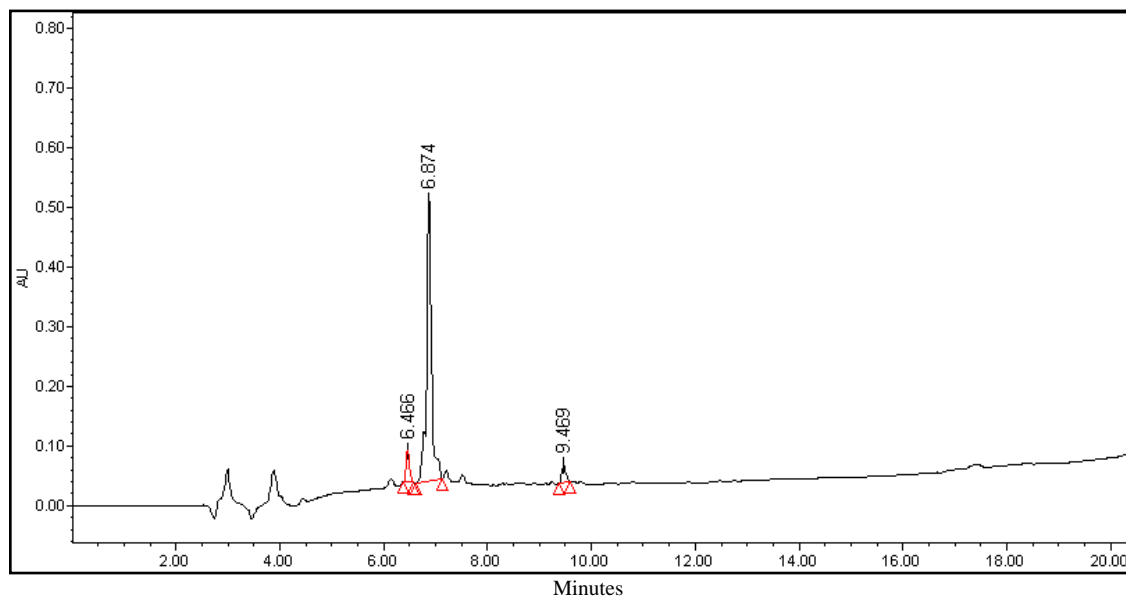

|   | RT    | % Area | Area ( $\mu\text{V} \cdot \text{sec}$ ) |
|---|-------|--------|-----------------------------------------|
| 1 | 6.466 | 6.88   | 53173                                   |
| 2 | 6.874 | 88.09  | 473200                                  |
| 3 | 9.469 | 5.03   | 38875                                   |

**Supplementary Figure S7** ESI-MS Analysis of PSMA-1-R<sub>6</sub>

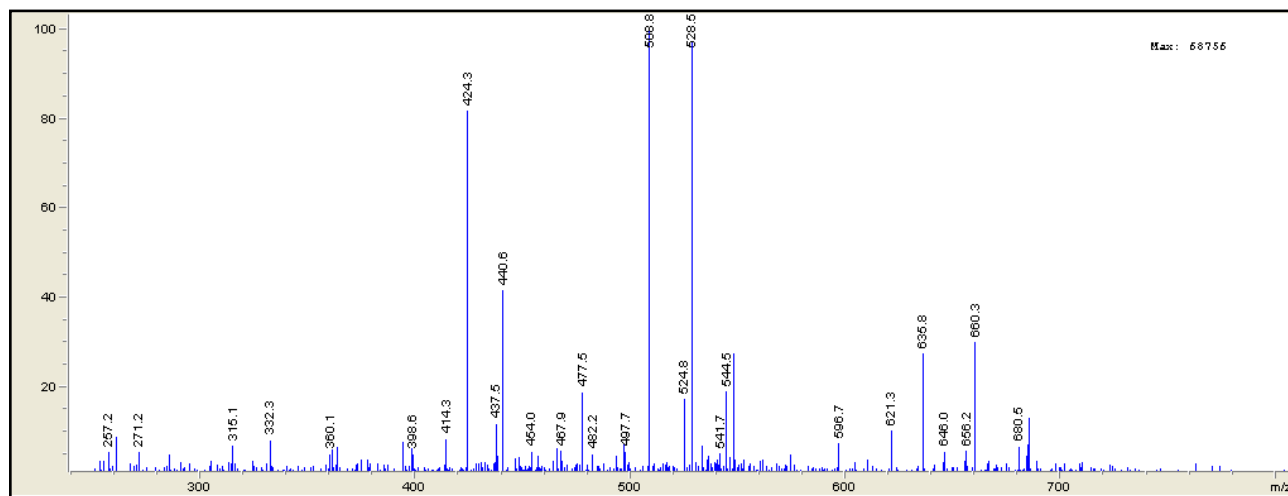

**Supplementary Figure S8** RP IP HPLC Analysis of FITC-PSMA-1-R<sub>9</sub> (220nm)

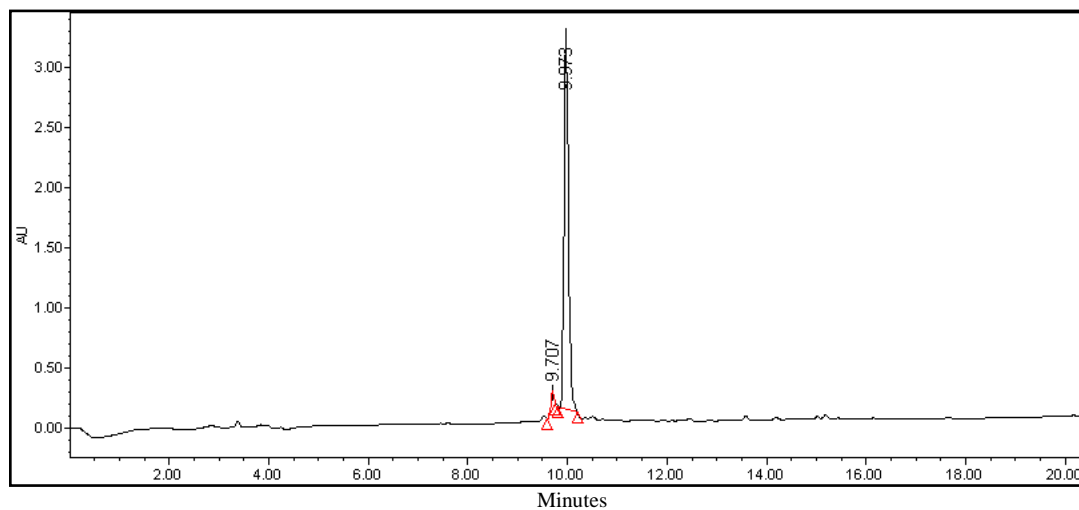

|   | RT    | % Area | Area ( $\mu\text{V}\cdot\text{sec}$ ) |
|---|-------|--------|---------------------------------------|
| 1 | 9.707 | 3.18   | 149571                                |
| 2 | 9.973 | 96.82  | 3153448                               |

**Supplementary Figure S9** RP IP HPLC Analysis of FITC-PSMA-1-R<sub>9</sub> (480nm)

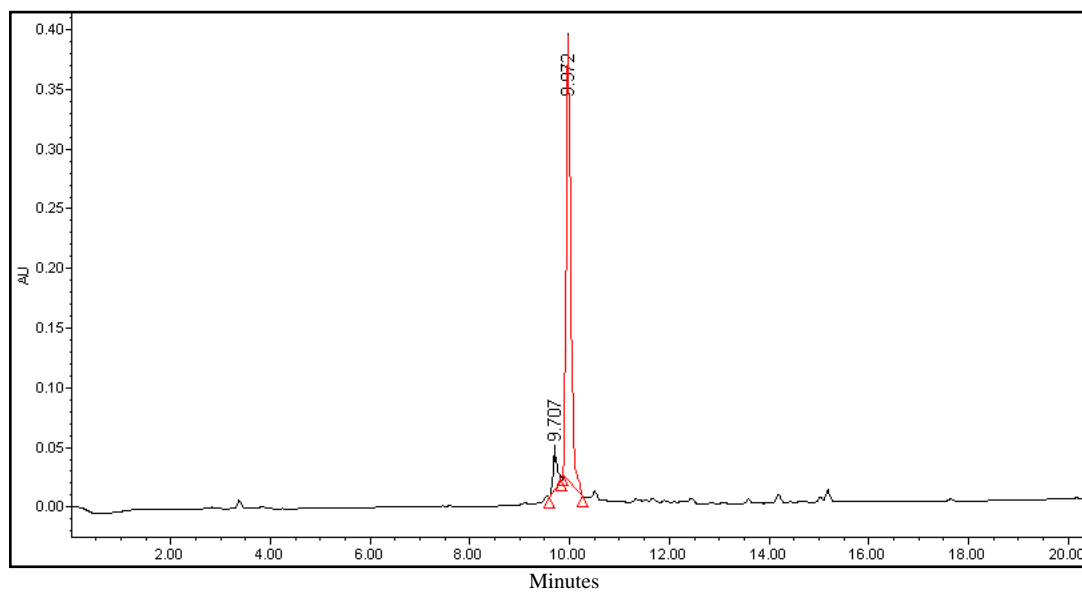

|   | RT    | % Area | Area ( $\mu\text{V}\cdot\text{sec}$ ) |
|---|-------|--------|---------------------------------------|
| 1 | 9.707 | 7.22   | 28945                                 |
| 2 | 9.973 | 92.78  | 371957                                |

Supplementary Figure S10 ESI-MS Analysis of FITC-PSMA-1-R<sub>9</sub>

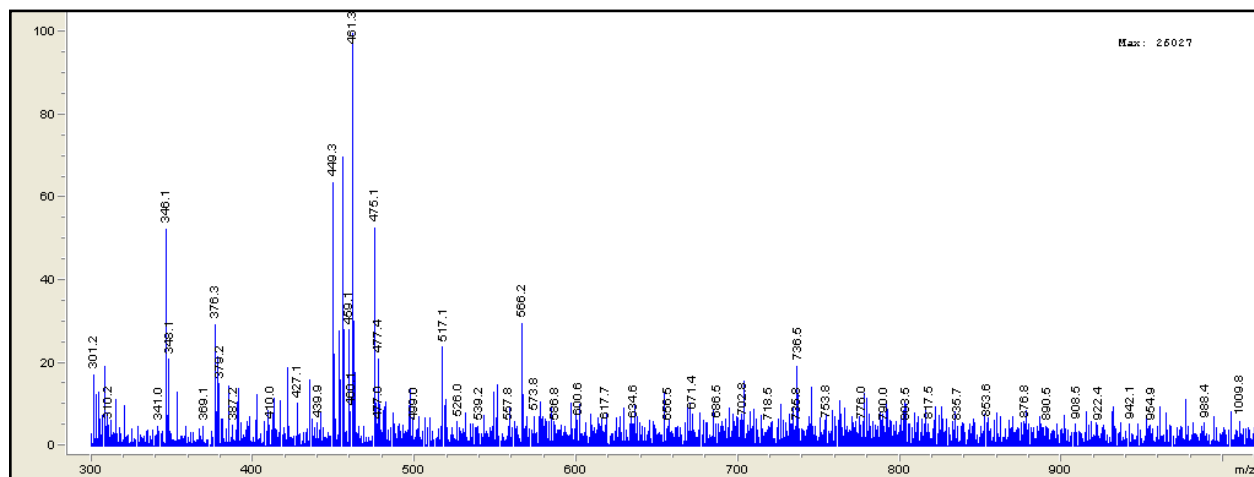

Supplement: mmc1.pdf [file mmc1.pdf]
